# Supplementary material for: Comparative analysis and characterization of the gut microbiota of four farmed snakes from southern China
Source: PeerJ journal article supplement (doi:10.7717/peerj.6658), 2019-03-29

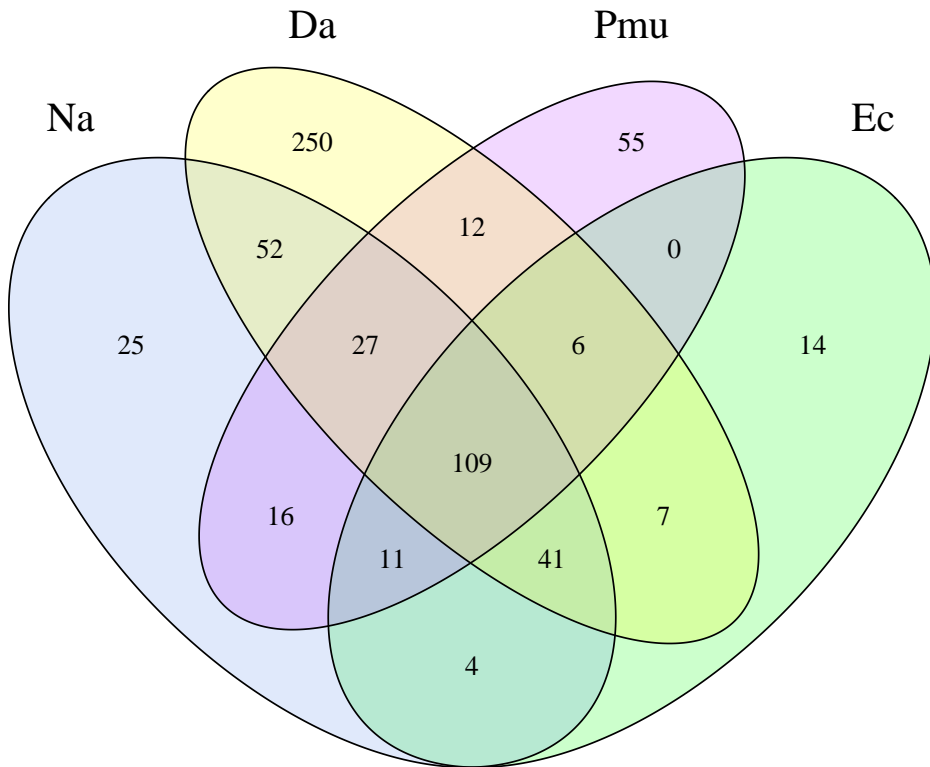

Supplement: Figure_S2.pdf [file Figure_S2.pdf]
