# Supplementary material for: Comparative analysis and characterization of the gut microbiota of four farmed snakes from southern China
Source: PubMed Central journal article supplement (PMC6442672; doi:10.7717/peerj.6658), 2019-03-29

(A)

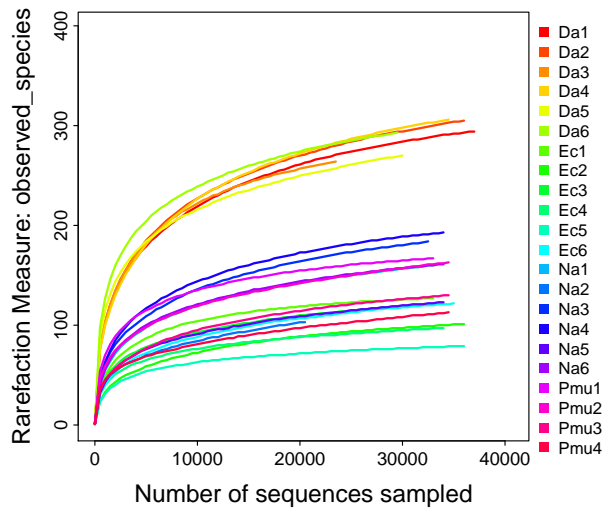

(B)

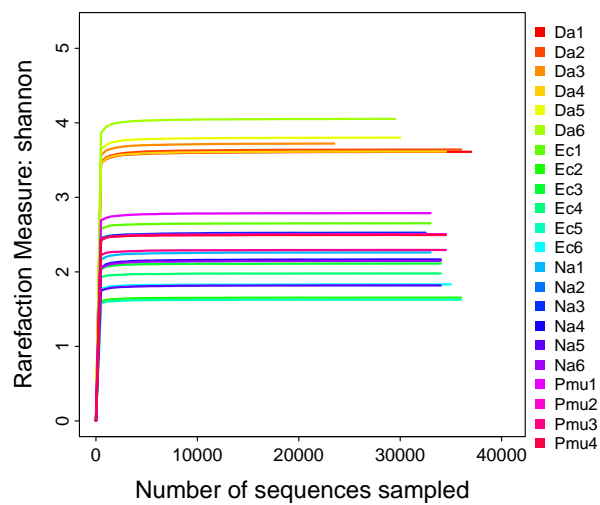

Supplement: peerj-07-6658-s001.pdf [file peerj-07-6658-s001.pdf]
